# Supplementary material
Source: publisher figshare collection journal article supplement (https://frontiersin.figshare.com/ndownloader/files/16621970)
Supplement: Supplementary file [file 16621970]

## Supplementary TABLE 1: Summary of studies on valence effects in word processing.

### Supplementary TABLE 1A: Summary of studies on valence effects in word processing in adults

ACC: Accuracy, RT: Reaction Times

Adv-pos/neg: behavioral advantage for stimuli with positive / negative valence

pos=neg: no significant difference between positive and negative stimuli.

| Paper number | Authors                | Participants                                    | Method/Task                                                                                                                                                                                  | Language; Stimuli                                                                                                                                                           | Results                                                                                                                                                                                                                                  | Valence effect Direction    |
|--------------|------------------------|-------------------------------------------------|----------------------------------------------------------------------------------------------------------------------------------------------------------------------------------------------|-----------------------------------------------------------------------------------------------------------------------------------------------------------------------------|------------------------------------------------------------------------------------------------------------------------------------------------------------------------------------------------------------------------------------------|-----------------------------|
| 1            | Adelman & Estes (2013) | n=142 undergraduates from Cortese et al. (2010) | Memory task, Recognition memory scores by Cortese et al. (2010) merged with emotionality ratings from Adelman & Estes (2013) Analysis of influence of arousal and valence on memory of words | English; 2578 written positive, negative and neutral words                                                                                                                  | <ul style="list-style-type: none"> <li>- Emotion words were remembered better than neutral words</li> <li>- No effect of valence on memory</li> </ul>                                                                                    | ACC: Pos = neg              |
| 2            | Bayer et al. (2012)    | n=24 (12 female), mean age = 23.1 years         | EEG, Reading, Lexical Decision                                                                                                                                                               | German; Written words: 180 nouns taken from BAWL                                                                                                                            | <ul style="list-style-type: none"> <li>- Negative words slower than neutral words</li> <li>- Negative words less accurate than positive and neutral words</li> </ul>                                                                     | RT: Adv-pos<br>Acc: Adv-pos |
| 3            | Citron et al. (2013)   | n=31 (16 female), mean age= 24 years            | EEG, Lexical Decision                                                                                                                                                                        | English; Written words: 150 words, positive - negative - neutral, 150 non-words                                                                                             | <ul style="list-style-type: none"> <li>- Positive and negative faster than neutral</li> <li>- Positive words more accurate than negative and neutral words</li> <li>- High arousal words more accurate than low arousal words</li> </ul> | RT: Pos=neg<br>Acc: Adv-pos |
| 4            | Child et al. (2018)    | n=36, mean age= 22 years                        | Reading                                                                                                                                                                                      | English; Written texts: 12positive, 12negative                                                                                                                              | - No difference in reading time of positive and negative texts                                                                                                                                                                           | Reading time: Pos =neg      |
|              |                        | n=80, mean age= 21 years                        | Reading + matching/ mismatching condition                                                                                                                                                    | English; Written texts: 12positive, 12negative, 12 with a match of implicit emotional content and explicit emotion word, 12 with mismatch of implicit emotional content and | - No difference in reading time of positive and negative texts                                                                                                                                                                           | Reading time: Pos =neg      |

|   |                              |                                        |                                                                                 | explicit emotion term                                              |                                                                                                                                                                                                             |                                |
|---|------------------------------|----------------------------------------|---------------------------------------------------------------------------------|--------------------------------------------------------------------|-------------------------------------------------------------------------------------------------------------------------------------------------------------------------------------------------------------|--------------------------------|
| 5 | Dijksterhuis & Aarts (2003)  | n=25                                   | Word detection (Lexical Decision)                                               | Dutch; Written words: 30 words, positive - negative - neutral      | - Negative words detected more often than positive words                                                                                                                                                    | Acc: Adv-neg                   |
|   |                              | n=56                                   | Emotional categorization: Positive vs. negative                                 |                                                                    | - Negative words categorized more accurate than positive words                                                                                                                                              | Acc: Adv-neg                   |
|   |                              | n=31                                   | Emotional categorization: Positive vs. negative combined with synonymy decision |                                                                    | - Negative word categorized more accurate than positive words<br>- Synonymy decision: positive as accurate as negative                                                                                      | Acc: Adv-neg<br>Acc: Pos = neg |
| 6 | Estes & Verges (2008)        | n=51                                   | Lexical Decision                                                                | English; Written words: 40 words, positive - negative 40 non-words | - Positive words faster than negative words                                                                                                                                                                 | RT: Adv-pos<br>Acc: Pos = neg  |
|   |                              | n=51                                   | Valence Judgement                                                               |                                                                    | - Negative faster than positive                                                                                                                                                                             | RT: Adv-neg<br>Acc: Pos = neg  |
| 7 | Ferré & Sanchez-Casas (2014) | n=57 (44 female), mean age =19.9 years | Lexical Decision, word-word Priming                                             | Spanish; Written words: 48 concrete words positive-negative        | - Positive words faster than negative<br>- Semantic priming effect but no affective priming effect<br>- Participants were faster when words were semantically related                                       | RT: Adv-pos                    |
|   |                              | n=56 (52 female), mean age =20,3 years |                                                                                 | Spanish; Written words: 48 abstract words positive-negative        | - Positive words faster than negative<br>- No semantic priming effect<br>- Affective priming: faster reaction times when the valence is congruent                                                           | RT: Adv-pos                    |
| 8 | Goh et al. (2016)            | n=40                                   | Lexical Decision                                                                | English; audibly presented words: 514 concrete nouns 468 non-words | - Positive faster than negative<br>- Faster RT for more concrete words and words with higher number of semantic features<br>- Very negative and very positive faster than neutral<br>- No effect of arousal | RT: Adv-pos                    |

|    |                        |                                       |                                                                     |                                                                                              |                                                                                                                                                                                                                                                                                                                                                                                                                                                    |                                 |
|----|------------------------|---------------------------------------|---------------------------------------------------------------------|----------------------------------------------------------------------------------------------|----------------------------------------------------------------------------------------------------------------------------------------------------------------------------------------------------------------------------------------------------------------------------------------------------------------------------------------------------------------------------------------------------------------------------------------------------|---------------------------------|
|    |                        | n=40                                  | Semantic Categorization: abstract vs. concrete                      |                                                                                              | <ul style="list-style-type: none"> <li>- Positive faster than negative</li> <li>- Faster RT for more concrete words and words with higher number of semantic features</li> <li>- Very negative and very positive faster than neutral</li> <li>- No effect of arousal</li> </ul>                                                                                                                                                                    | RT: Adv-pos                     |
| 9  | Herbert et al. (2006)  | n=26 (10 female), mean age = 26 years | EMG and EEG, Valence judgement, Memorization                        | German; Written words: 180 adjectives, pleasant-unpleasant-neutral                           | <ul style="list-style-type: none"> <li>- EMG startle eye blink: blink facilitation for pleasant words</li> </ul>                                                                                                                                                                                                                                                                                                                                   | ACC: Adv-pos                    |
| 10 | Herbert et al. (2008)  | n= 16 (8 female), mean age = 27 years | EEG, Silent reading; surprise free recall task                      | German; Written words: 60 pleasant, 60 unpleasant, 60 neutral                                | <ul style="list-style-type: none"> <li>- Recall accuracy: better recall for pleasant words than for neutral and unpleasant words</li> </ul>                                                                                                                                                                                                                                                                                                        | Acc: Adv-pos                    |
| 11 | Hinojosa et al. (2010) | n=32 (28 female), mean age = 23 years | EEG, Word identification (identifying words among nonsense stimuli) | Spanish; Written words: 240 nouns, positive - negative - neutral 80 non-recognizable stimuli | <ul style="list-style-type: none"> <li>- No valence effects</li> </ul>                                                                                                                                                                                                                                                                                                                                                                             | RT: Pos = neg<br>Acc: Pos = neg |
|    |                        |                                       | EEG, Word identification (Lexical decision)                         | Spanish; Written words: 240 nouns, positive - negative - neutral 80 non-words                | <ul style="list-style-type: none"> <li>- Fewer omissions of positive words than of negative and neutral words</li> <li>- Positive words faster than negative and neutral words</li> </ul>                                                                                                                                                                                                                                                          | RT: Adv-pos<br>Acc: Adv-pos     |
| 12 | Hofmann et al. (2009)  | n=20 (16 female), mean age = 28 years | EEG, Lexical Decision                                               | German; Written words: 200 nouns 200 non-words                                               | <ul style="list-style-type: none"> <li>- Positive faster than neutral</li> <li>- Only negative words with high arousal faster than neutral words</li> <li>- Positive more accurate than neutral</li> <li>- Only negative words with high arousal more accurate than neutral words</li> <li>- Positive and negative words of same arousal: positive words faster and more accurate</li> <li>- Advantage for positive and highly arousing</li> </ul> | RT: Adv-pos<br>Acc: Adv-pos     |

|    |                              |                                                          |                                              |                                                                                                                                                               |                                                                                                                                                                                                                                                                                                           |                                                                     |
|----|------------------------------|----------------------------------------------------------|----------------------------------------------|---------------------------------------------------------------------------------------------------------------------------------------------------------------|-----------------------------------------------------------------------------------------------------------------------------------------------------------------------------------------------------------------------------------------------------------------------------------------------------------|---------------------------------------------------------------------|
|    |                              |                                                          |                                              |                                                                                                                                                               | negative words, arousal not facilitative for positive words                                                                                                                                                                                                                                               |                                                                     |
| 13 | Imbir et al. (2016)          | n=32 (15 female), mean age = 21,5                        | EEG, Lexical Decision                        | Polish;<br>Written words: 135 nouns<br>135 pseudo-words                                                                                                       | <ul style="list-style-type: none"> <li>- Positive words more likely to be classified correctly than negative and neutral words</li> <li>- RT: no effect of valence</li> </ul>                                                                                                                             | Acc: Adv-pos<br>RT: Pos = neg                                       |
| 14 | Inaba et al. (2005)          | n=16 (10 female), mean age = 22.3 years                  | EEG, Memorize-recognition task (old vs. new) | Japanese;<br>Written words: 150 affective nouns, positive - negative - neutral                                                                                | <ul style="list-style-type: none"> <li>- Higher hit rate for positive and negative words than for neutral words</li> <li>- More false alarms for positive than for negative words</li> <li>- Correct responses for positive words faster than correct responses for negative and neutral words</li> </ul> | Acc Hit rate: pos = neg<br>Acc False alarms: Adv-neg<br>RT: Adv-pos |
| 15 | Itkes & Mashal (2016)        | n=40 (23 female), mean age = 25.74 years                 | Semantic decision task                       | Hebrew;<br>32 written word pairs: comprising: one head noun and one modifier (positive or negative)                                                           | <ul style="list-style-type: none"> <li>- More correct responses to negative words</li> <li>- Response times to negative word pairs were slower than those of positive word pairs</li> </ul>                                                                                                               | ACC: Adv-neg<br>RT: Adv-pos                                         |
|    |                              |                                                          |                                              | 32 written word pairs: comprising: one head noun and one modifier (positive or negative and either incongruent or congruent with overall valence of the pair) | <ul style="list-style-type: none"> <li>- No difference between positive and negative word pairs</li> <li>- Responses to negative incongruent word pairs were slower than those to positive incongruent word pairs</li> </ul>                                                                              | ACC: pos=neg<br>RT: Adv-pos                                         |
| 16 | Kanske & Kotz (2007)         | n=30 (15 female), mean age = 25.6 years                  | EEG, Lexical Decision                        | German;<br>Written words: 240 nouns, positive-negative-neutral<br>240 non-words                                                                               | <ul style="list-style-type: none"> <li>- concrete words faster than abstract words</li> <li>- Positive and negative words faster than neutral words</li> <li>- Concrete positive words faster than concrete negative words</li> </ul>                                                                     | RT: Adv-pos                                                         |
| 17 | Kappes & Bermeitinger (2016) | Younger adults: n=41 (32 female), mean age = 20.9 years, | Emotional Stroop Task                        | German;<br>96 written nouns: negative high arousing nouns, negative medium                                                                                    | <ul style="list-style-type: none"> <li>- Faster responses for positive compared to negative words in younger adults</li> </ul>                                                                                                                                                                            | Younger adults: RT: Adv-pos                                         |

|    |                           |                                                                   |                                                                                                    |                                                                                                                                             |                                                                                                                                                                                                                                                                                                                                                                                                            |                                                                                                                                  |
|----|---------------------------|-------------------------------------------------------------------|----------------------------------------------------------------------------------------------------|---------------------------------------------------------------------------------------------------------------------------------------------|------------------------------------------------------------------------------------------------------------------------------------------------------------------------------------------------------------------------------------------------------------------------------------------------------------------------------------------------------------------------------------------------------------|----------------------------------------------------------------------------------------------------------------------------------|
|    |                           | Older adults:<br>n=39 (25<br>female),<br>mean age =<br>69.2 years |                                                                                                    | arousing nouns,<br>positive nouns,<br>neutral nouns                                                                                         | <ul style="list-style-type: none"> <li>- No differences in response times in older adults</li> <li>- No differences in error rates in both age groups</li> </ul>                                                                                                                                                                                                                                           | Older adults:<br>RT: pos=neg<br><br>ACC: pos=neg                                                                                 |
| 18 | Kever et al. (2017)       | n=60 (8<br>female),<br>mean age =<br>20.8 years                   | Word Decision<br>task (emotional vs<br>non-emotional) in<br>a low- and high-<br>arousing condition | French;<br>66 written<br>emotion related<br>words,<br>32 positive,<br>32 negative,<br>32 neutral                                            | <ul style="list-style-type: none"> <li>- Positive words were faster recognized than negative and neutral words</li> <li>- Negative words were faster recognized than neutral words</li> </ul>                                                                                                                                                                                                              | RT: Adv-pos                                                                                                                      |
| 19 | Kissler et al.<br>(2009)  | n=20 (10<br>female),<br>mean age = 9<br>years                     | EEG,<br>1. silent reading<br>2. counting of<br>adjectives<br>3. counting of<br>nouns               | German;<br>Written words:<br>198 nouns and<br>adjectives,<br>positive-<br>negative-neutral                                                  | <ul style="list-style-type: none"> <li>- Better memorization of positive words than of negative and neutral words</li> </ul>                                                                                                                                                                                                                                                                               | Acc: Adv-pos                                                                                                                     |
| 20 | Kousta et al.<br>(2009)   | n=79 (72<br>female),<br>mean age =<br>19,5 years                  | Lexical Decision                                                                                   | English;<br>Written words:<br>120 words,<br>positive -<br>negative -<br>neutral<br>120 non-words                                            | <ul style="list-style-type: none"> <li>- Emotion words faster and more accurate than neutral words</li> <li>- No difference between positive and negative words</li> </ul>                                                                                                                                                                                                                                 | RT: Pos = neg<br>Acc: Pos = neg                                                                                                  |
| 21 | Kuchinke et al.<br>(2005) | n=20 (12<br>female),<br>20-36 years,<br>mean age =<br>26.3        | fMRI, Lexical<br>Decision                                                                          | German;<br>Written words:<br>150 nouns<br>positive -<br>negative -<br>neutral 150<br>non-words                                              | <ul style="list-style-type: none"> <li>- Positive faster than neutral and negative words</li> <li>- Positive more accurate than neutral words</li> </ul>                                                                                                                                                                                                                                                   | RT: Adv-pos<br>Acc: Adv-pos                                                                                                      |
| 22 | Kuchinke et al.<br>(2007) | n=26 (16<br>female),<br>18-35 years,<br>mean age =<br>24.1        | Pupillary<br>responses, Lexical<br>Decision                                                        | German;<br>Written words:<br>90 low<br>frequency and<br>90 high<br>frequency<br>words, positive -<br>negative -<br>neutral<br>180 non-words | High frequency words:<br><ul style="list-style-type: none"> <li>- Positive faster than neutral and negative words</li> <li>- accuracy: no difference between negative, positive and neutral</li> </ul> Low frequency words:<br><ul style="list-style-type: none"> <li>- Positive and negative words faster than neutral words</li> <li>- Positive more accurate than negative and neutral words</li> </ul> | RT (high freq.):<br>Adv-pos<br>Acc (high freq.):<br>Pos = neg<br><br>RT (low freq.):<br>Pos = neg<br>Acc (low freq.):<br>Adv-pos |

|    |                           |                                        |                                                                                                   |                                                                                                                                                                   |                                                                                                                                                                                                                                                                                                                                                                                                                                                                                                                                       |                                                                              |
|----|---------------------------|----------------------------------------|---------------------------------------------------------------------------------------------------|-------------------------------------------------------------------------------------------------------------------------------------------------------------------|---------------------------------------------------------------------------------------------------------------------------------------------------------------------------------------------------------------------------------------------------------------------------------------------------------------------------------------------------------------------------------------------------------------------------------------------------------------------------------------------------------------------------------------|------------------------------------------------------------------------------|
| 23 | Kuperman et al. (2014)    | Taken from Balota et al. (2007)        | Statistical analyses based on existing databases                                                  | English; 12658 written words                                                                                                                                      |                                                                                                                                                                                                                                                                                                                                                                                                                                                                                                                                       |                                                                              |
|    |                           |                                        | Lexical Decision                                                                                  |                                                                                                                                                                   | <ul style="list-style-type: none"> <li>- Positive words faster than negative words</li> <li>- Low-arousal words faster than high-arousal words</li> </ul>                                                                                                                                                                                                                                                                                                                                                                             | RT: Adv-pos                                                                  |
|    |                           |                                        | Naming                                                                                            |                                                                                                                                                                   | <ul style="list-style-type: none"> <li>- Same tendencies but less strong</li> </ul>                                                                                                                                                                                                                                                                                                                                                                                                                                                   | RT: Adv-pos                                                                  |
| 24 | Lee & Potter (2018)       | n=55 (24 female), mean age= 21 years   | Facial EMG & cardiac response measured as interbeat interval, Memory task (Forced choice, yes/no) | English; 16 altered radio advertisements with 2 positive, 2 negative, 2 neutral target words included                                                             | <ul style="list-style-type: none"> <li>- Positive words were remembered more correctly than neutral words and negative words</li> </ul>                                                                                                                                                                                                                                                                                                                                                                                               | ACC: Adv-pos                                                                 |
| 25 | Liu et al. (2016)         | n=20 (10 female), mean age= 23,3 years | EEG, Emotional Categorization Task + Memory Task                                                  | Chinese Chengyu; 640 written words (traditional Chinese idiomatic expressions): 320 positive 320 negative                                                         | <ul style="list-style-type: none"> <li>- More accurate and faster responses in categorization for positive words compared to negative words</li> <li>- Participants remembered more positive than negative words</li> </ul>                                                                                                                                                                                                                                                                                                           | Categorization:<br>ACC: Adv-pos<br>RT: Adv-pos<br><br>Recall:<br>ACC Adv-pos |
| 26 | Madan et al. (2017)       | n=39 (27 female), mean age= 19,9 years | Lexical Decision<br>Free recall task                                                              | English;<br>4 written word lists of 40 words:<br><br>1 with highly arousing taboo words<br>1 with positive words<br>1 with negative words<br>1 with neutral words | Lexical decision:<br><ul style="list-style-type: none"> <li>- No differences in RTs between positive and negative words</li> <li>- Greater RTs for taboo words compared to RTs for positive and neutral words, but no differences in RTs between taboo words and negative words</li> <li>- Greater RTs for negative words compared to neutral words</li> </ul> Recall task:<br><ul style="list-style-type: none"> <li>- Taboo words were better recalled than all other word types</li> </ul> No differences between other word types | RT (Lexical decision):<br>pos=neg<br><br>ACC (recall):<br>pos=neg            |
| 27 | Martin & Altarriba (2017) | n=85 (41 female), mean age= 19 years   | Lexical decision task with hemifield presentation of words                                        | English; written words: 10 positive emotion words, 10 negative emotion words,                                                                                     | <ul style="list-style-type: none"> <li>- Positive words faster than negative</li> </ul>                                                                                                                                                                                                                                                                                                                                                                                                                                               | RT: Adv-pos                                                                  |

|    |                           |                                           |                                                 |                                                                                           |                                                                                                                                                                                                                                                                                                                                                                                                                       |                                 |
|----|---------------------------|-------------------------------------------|-------------------------------------------------|-------------------------------------------------------------------------------------------|-----------------------------------------------------------------------------------------------------------------------------------------------------------------------------------------------------------------------------------------------------------------------------------------------------------------------------------------------------------------------------------------------------------------------|---------------------------------|
|    |                           |                                           |                                                 | 10 positive emotion-laden words,<br>10 negative emotion-laden words,<br>40 neutral words  |                                                                                                                                                                                                                                                                                                                                                                                                                       |                                 |
| 28 | Müller & Kuchinke (2016)  | n=39 (34 female),<br>mean age= 23.1 years | EEG, Electrooculogram, Lexical Decision         | German;<br>Written nouns:<br>25 happy<br>25 fear-related<br>25 neutral<br><br>75 nonwords | <ul style="list-style-type: none"> <li>- Positive words were faster processed than fear-related and neutral words</li> <li>- No differences in processing speed between neutral and fear-related words</li> <li>- More errors for fear-related words compared to neutral and positive words</li> <li>- No differences between error rates of neutral and positive words</li> </ul>                                    | RT: Adv-pos<br><br>ACC: Adv-pos |
| 29 | Nasrallah & Carmel (2009) | n=27 (20 female),<br>mean age= 26 years   | Emotional categorization: Positive vs. negative | English;<br>Written words: positive - negative - neutral                                  | <ul style="list-style-type: none"> <li>- Negative words more accurate than positive and neutral words</li> </ul>                                                                                                                                                                                                                                                                                                      | Acc: Adv-neg                    |
| 30 | Palazova et al. (2011)    | n=20 (13 female),<br>mean age= 22.8 years | EEG, Lexical Decision                           | German;<br>Written words: 180 words, positive - negative - neutral 180 pseudo-words       | <ul style="list-style-type: none"> <li>- Positive words faster than negative words, both faster than neutral words</li> <li>- positive and negative words more accurate than neutral words</li> <li>- high frequent words faster and more accurate than low frequent words</li> <li>- nouns faster and more accurate than adjectives and verbs</li> <li>- words faster and more accurate than pseudo-words</li> </ul> | RT: Adv-pos<br>Acc: Pos = neg   |
| 31 | Palazova et al. (2013)    | n=42 (21 female),<br>mean age= 24,1       | EEG, Lexical Decision                           | German;<br>480 written words: - positive -negative - neutral<br>480 pseudo-words          | <ul style="list-style-type: none"> <li>- Neutral words faster than positive and negative words</li> <li>- Neutral and negative words more accurate than positive words</li> </ul>                                                                                                                                                                                                                                     | RT: Pos = neg<br>Acc: Adv-neg   |
| 32 | Ponari et al. (2015)      | n=95(60 female), mean age= 23,            | Lexical Decision                                | English;<br>Written words: 111 words,                                                     | <ul style="list-style-type: none"> <li>- Overall: positive words faster than negative words,</li> </ul>                                                                                                                                                                                                                                                                                                               | Overall:<br>RT: Adv-pos         |

|    |                            |                                                                                                  |                                                           |                                                                                               |                                                                                                                                                                                                                                                                                                                                                            |                                                                   |
|----|----------------------------|--------------------------------------------------------------------------------------------------|-----------------------------------------------------------|-----------------------------------------------------------------------------------------------|------------------------------------------------------------------------------------------------------------------------------------------------------------------------------------------------------------------------------------------------------------------------------------------------------------------------------------------------------------|-------------------------------------------------------------------|
|    |                            | native English speakers<br><br>n=156 (125 female), English as second language, early vs. late L2 |                                                           | positive - negative - neutral<br>111 non-words                                                | <ul style="list-style-type: none"> <li>both faster than neutral words</li> <li>- Native + early L2: positive and negative words faster than neutral words, no difference between positive and negative</li> <li>- Late L2: Positive words faster than negative words, both faster than neutral words</li> </ul>                                            | <p>Native + Early L2: Pos = neg</p> <p>Late L2: Adv-pos</p>       |
| 33 | Rohr & Abdel Rahman (2018) | n=28 (24 female), mean age 22                                                                    | EEG, Language production (translation) task + recall task | English; 126 written words, presented in 42 triplets (1 positive, 1 negative, 1 neutral word) | <ul style="list-style-type: none"> <li>- Participants made more errors in producing the German translation of previously shown English negative words compared to neutral and positive words</li> <li>- No differences in error rates of positive and neutral words</li> </ul>                                                                             | ACC: Adv-pos                                                      |
| 34 | Santaniello et al. (2018)  | n=30 (21 female), age range 20 to 47 years, mean age = 25                                        | EEG, Online recognition memory task                       | Spanish; 135 written nouns: 45 positive, 45 neutral 45 negative                               | <ul style="list-style-type: none"> <li>- Faster reactions for negative words compared to positive words</li> <li>- Higher hit rates for negative words compared to positive and neutral words</li> <li>- More false alarms for positive words compared to negative and neutral words</li> </ul>                                                            | <p>ACC: Adv-neg</p> <p>RT: Adv-neg</p>                            |
| 35 | Scott et al. (2009)        | n=26 (15 female), mean age=21                                                                    | EEG, Lexical Decision                                     | English; 240 written words: - positive -negative -neutral                                     | <ul style="list-style-type: none"> <li>- Positive and negative words faster than neutral</li> <li>- High frequent faster than low frequent words</li> <li>- Interaction of emotion and frequency</li> <li>- Low frequency: positive and negative words faster than neutral</li> <li>- High frequency: positive faster than negative and neutral</li> </ul> | <p>RT: Pos = neg</p> <p>RT: Adv-pos (for high frequent words)</p> |
| 36 | Scott et al. (2014)        | n=24 (16 female),                                                                                | Lexical Decision                                          | English; 216 written words, - positive - negative - neutral                                   | <ul style="list-style-type: none"> <li>- Low frequency: no difference between positive and negative words</li> <li>- High frequency: positive faster</li> </ul>                                                                                                                                                                                            | <p>RT: Pos = neg</p> <p>RT: Adv-pos (for high frequent words)</p> |



|    |                        |                                                                                                                  |                                                                             |                                                                                                                        |                                                                                                                                                                                                                           |                                 |
|----|------------------------|------------------------------------------------------------------------------------------------------------------|-----------------------------------------------------------------------------|------------------------------------------------------------------------------------------------------------------------|---------------------------------------------------------------------------------------------------------------------------------------------------------------------------------------------------------------------------|---------------------------------|
|    |                        |                                                                                                                  |                                                                             |                                                                                                                        | than negative and neutral                                                                                                                                                                                                 |                                 |
| 37 | Stenberg et al. (1998) | n=50 (20 female), 20-34 years, mean age (median) = 26                                                            | Valence Decision                                                            | Swedish; 120 positive and negative words - superimposed on faces (5 angry, 5 happy, 3 neutral expressions)             | - Positive faces were categorized faster than negative ones                                                                                                                                                               | RT: Adv-pos                     |
| 38 | Võ et al. (2006)       | n=21 (13 female), 21-26 years, mean age = 21.45                                                                  | Valence Decision                                                            | German; 60 written affective words: positive, negative neutral                                                         | - Positive faster than negative words<br>- Negative words faster than neutral words                                                                                                                                       | RT: Adv-pos                     |
| 39 | Yang et al. (2013)     | n=16 (8 female), 21-26 years, mean age = 23.05                                                                   | EEG, Word counting task (identify identical word stimuli in a row of words) | Chinese; Written words: 24 almost neutral, low and high positive words; 24 almost neutral, low and high negative words | - No effect of valence                                                                                                                                                                                                    | RT: Pos = neg                   |
| 40 | Yao et al. (2016)      | 1. n=19 (10 female), mean age = 21.4 years, native Chinese speakers<br>2. n=20 (9 female), mean age = 22.3 years | EEG, Lexical Decision                                                       | Chinese; Written words: 80 concrete 80 abstract 120 pseudo-words                                                       | - Concrete words: positive words faster<br>- No difference between high and low arousal<br>- Abstract words: positive words with low arousal faster than high arousal<br>- Negative: high arousal faster than low arousal | RT: Adv-pos                     |
| 41 | Yap & Seow (2013)      | n=44                                                                                                             | Lexical Decision Replication of Kousta et al. 2009 (see above)              | Written words: (Stimuli identical to Kousta et al. 2009)                                                               | - Emotion words faster and more accurate than neutral words<br>- No difference between positive and negative words                                                                                                        | RT: Pos = neg<br>Acc: Pos = neg |
|    |                        | n=52                                                                                                             | go/no go Lexical Decision                                                   |                                                                                                                        | - Emotion words faster and more accurate than neutral words<br>- No difference between positive and negative words                                                                                                        | RT: Pos = neg<br>Acc: Pos = neg |
| 42 | Zhao et al. (2018)     | n=18 (9 female), mean age = 20.8 years                                                                           | EEG, dual-target rapid serial visual presentation task (Memory task)        | Chinese; 18 written adjectives: 6 positive 6 negative 6 neutral                                                        | - Better presence determination of positive and negative words compared to neutral words<br>- No difference in accuracy between                                                                                           | Acc: Pos = neg                  |

|  |                                   |                             |
|--|-----------------------------------|-----------------------------|
|  | 12 pseudo-words,                  | positive and negative words |
|  | 4 strings of four repeated digits |                             |

## Supplementary TABLE 1B: Summary of studies on valence effects in word processing in children

ACC: Accuracy, RT: Reaction Times

Adv-pos/neg: behavioral advantage for stimuli with positive / negative valence

pos=neg: no significant difference between positive and negative stimuli.

| Paper number | Authors                  | Participants                                                                       | Method/Task                  | Language; Stimuli                                                                                                                                                                                                                                               | Results                                                                                                                                                                                                                                                                                                                                                                         | Valence effect Direction                                                                                                                                                          |
|--------------|--------------------------|------------------------------------------------------------------------------------|------------------------------|-----------------------------------------------------------------------------------------------------------------------------------------------------------------------------------------------------------------------------------------------------------------|---------------------------------------------------------------------------------------------------------------------------------------------------------------------------------------------------------------------------------------------------------------------------------------------------------------------------------------------------------------------------------|-----------------------------------------------------------------------------------------------------------------------------------------------------------------------------------|
| 1            | Bahn et al. (2017)       | n in total = 120 5-, 6-, 9-, 12-year-olds and adults, each group: n=24 (12 female) | Lexical Decision             | German; 48 audibly presented emotion words: 24 positive, 24 negative<br><br>For lexical decision (additionally): 48 audibly presented concrete neutral words 96 audibly presented pseudo-words<br><br>All words were recorded with a non-emotional neutral tone | <ul style="list-style-type: none"> <li>- More correct reactions for positive compared to neutral and negative words in 5- and 6-year-olds</li> <li>- No effect of valence in accuracy in 9- and 12-year-olds and adults</li> <li>- Faster reaction times for negative words in 6-year-olds</li> <li>- No effect of valence in reaction times in all other age groups</li> </ul> | <b>ACC:</b><br>Adv-pos in 5- & 6-year-olds<br>Pos = neg in 9- & 12-year-olds & adults<br><br><b>RT:</b><br>Adv-neg in 6-year-olds<br><br>Pos=neg in 5-, 9-, 12-year-olds & adults |
|              |                          |                                                                                    | Emotional Categorization     |                                                                                                                                                                                                                                                                 | see Table 1 (main text)                                                                                                                                                                                                                                                                                                                                                         | see Table 1 (main text)                                                                                                                                                           |
| 2            | Pérez-Edgar & Fox (2007) | n=65 (29 female), 7 years                                                          | EEG, Auditory attention task | English; 60 audibly presented words repeated 3 times from 5 categories: high positive rating, low social rating; low positive, low social; high positive, high social; low positive, high social; neutral in both                                               | <ul style="list-style-type: none"> <li>- Positive words faster than negative words</li> </ul>                                                                                                                                                                                                                                                                                   | <b>RT: Adv-pos</b>                                                                                                                                                                |
| 3            | Ponari et al. (2018)     | n=60(34 female), 6-12 years, mean age = 8.09                                       | Lexical Decision             | English; 24 audibly presented concrete words: 7 positive                                                                                                                                                                                                        | Abstract words:<br><ul style="list-style-type: none"> <li>- Positive-neutral comparison:</li> <li>- 8- to 9-year-olds recognized</li> </ul>                                                                                                                                                                                                                                     | <b>Abstract words:</b><br>ACC: Pos = neg<br><br><b>Concrete words:</b><br>ACC: Pos = neg                                                                                          |

|   |                      |                                                                                                                        |                                                   |                                                                                                                   |                                                                                                                                                                                                                                                                                                                                                                                                                                                                                                                                                                                                                                                                                                                       |                                                                            |
|---|----------------------|------------------------------------------------------------------------------------------------------------------------|---------------------------------------------------|-------------------------------------------------------------------------------------------------------------------|-----------------------------------------------------------------------------------------------------------------------------------------------------------------------------------------------------------------------------------------------------------------------------------------------------------------------------------------------------------------------------------------------------------------------------------------------------------------------------------------------------------------------------------------------------------------------------------------------------------------------------------------------------------------------------------------------------------------------|----------------------------------------------------------------------------|
|   |                      | divided in three age groups: 6-7 years; 8-9 years; 10-11 years                                                         |                                                   | <p>7negative<br/>7neutral</p> <p>24audibly presented abstract words:<br/>7positive<br/>7negative<br/>7neutral</p> | <p>positive words better than neutral words</p> <ul style="list-style-type: none"> <li>- no differences in 6- to7-year-olds and 10-to 11-year-olds</li> <li>- Negative-neutral comparison:</li> <li>- no differences in all age groups</li> <li>- Negative-positive comparison:</li> <li>- no differences in all age groups</li> </ul> <p>concrete words (in all age groups):</p> <ul style="list-style-type: none"> <li>- Positive-Neutral comparison:</li> <li>- Neutral words were better recognized than positive words</li> <li>- Negative-Neutral comparison:</li> <li>- Neutral words were better recognized than negative words</li> <li>- Positive-Negative comparison:</li> <li>- No differences</li> </ul> |                                                                            |
| 4 | Quas et al. (2016)   | <p>n=83 (43 female), 7 to 8 years, mean age = 7.96, and</p> <p>n= 85 (44 female), 12 to 14 years, mean age = 13.46</p> | Memory task                                       | <p>English;<br/>180 audibly presented words:<br/>60 positive<br/>60 negative<br/>60 neutral</p>                   | <ul style="list-style-type: none"> <li>- Adolescents: Higher number of correctly recalled negative words compared to positive words</li> <li>- Children: No effect of valence on accuracy in recall</li> </ul>                                                                                                                                                                                                                                                                                                                                                                                                                                                                                                        | <p>ACC<br/>Adolescents:<br/>Adv-neg</p> <p>ACC Children:<br/>Pos = neg</p> |
| 5 | Salehi et al. (2018) | n=10 (3 female), 9 years                                                                                               | EEG, Loud Reading                                 | <p>Farsi<br/>120 written words:<br/>40 positive<br/>40 negative<br/>40 neutral</p>                                | <ul style="list-style-type: none"> <li>- More correct reactions for positive words, compared to negative words</li> <li>- No differences between positive and neutral words and between neutral and negative words</li> </ul>                                                                                                                                                                                                                                                                                                                                                                                                                                                                                         | <p>ACC: Adv-pos<br/>RT: Pos = neg</p>                                      |
| 6 | Silk et al. (2009)   | n=64 (39 female), 8.1 to 17.9 years, mean age = 13.2                                                                   | measure of pupillary reactivity, Valence Decision | <p>English;<br/>66 written words<br/>positive<br/>negative<br/>neutral</p>                                        | <ul style="list-style-type: none"> <li>- No effect of valence</li> </ul>                                                                                                                                                                                                                                                                                                                                                                                                                                                                                                                                                                                                                                              | <p>RT: Pos = neg</p>                                                       |

|   |                         |                                                                                                                  |                  |                                                                                          |                                                                                                                                                                                                             |             |
|---|-------------------------|------------------------------------------------------------------------------------------------------------------|------------------|------------------------------------------------------------------------------------------|-------------------------------------------------------------------------------------------------------------------------------------------------------------------------------------------------------------|-------------|
| 7 | Sylvester et al. (2016) | n=47 (17 female), 9-12 years, mean age = 10.3                                                                    | Valence Decision | German;<br>90 written affective words:<br>- positive<br>- negative<br>- neutral          | <ul style="list-style-type: none"> <li>- Positive faster than negative</li> <li>- Negative faster than neutral</li> <li>- Most correct responses for positive words</li> </ul>                              | RT: Adv-pos |
| 8 | Vermeulen et al. (2017) | n=386 (212 female), 9-11 years, mean age = 10.5                                                                  | Memory task      | Dutch;<br>Two written word sets of 30 words:<br>10 positive<br>10 negative<br>10 neutral | <ul style="list-style-type: none"> <li>- Higher number of correctly recalled neutral and positive words, compared to negative words</li> <li>- No differences between positive and neutral words</li> </ul> | ACC Adv-pos |
| 9 | Zhang et al. (2018)     | n=90, 7 to 8 years, mean age = 7.50,<br><br>n=90, 11 to 12 years, mean age = 11.40<br><br>n=90, mean age = 20.37 | Memory task      | English;<br>120 audibly presented words:<br>40 positive<br>40 negative<br>40 neutral     | <ul style="list-style-type: none"> <li>- Neutral words were recalled better than negative and positive words</li> <li>- Negative words were recalled better than positive words</li> </ul>                  | ACC Adv-neg |

Missing details about the participants' age and gender breakdown (see column 'participants') are due to missing information in the relevant publication.
